# Supplementary material for: Alcohol Disinhibition of Behaviors in C. elegans
Source: PubMed Central journal article supplement (PMC3969370; doi:10.1371/journal.pone.0092965), 2014-03-28
Supplement: pone.0092965.s001.pdf [file pone.0092965.s001.pdf]

| Genotype              | Treatment | Head bends during 60 seconds (before/during blue-light exposure) for different individual worms                                                                                                                                                                                          |
|-----------------------|-----------|------------------------------------------------------------------------------------------------------------------------------------------------------------------------------------------------------------------------------------------------------------------------------------------|
| wild-type (N2)        | Untreated | 90/81, 77/68, 90/70,80/80,80/85,90/86,84/87,78/88,98/89,71/78                                                                                                                                                                                                                            |
|                       | EtOH      | 41/32, 33/53, 41/42, 54/34, 18/28, 20/25, 25/35, 39/31, 13/15,24/32, 77/90,35/66, 26/58, 33/73, 56/72, 23/52, 11/18, 13/47,67/84                                                                                                                                                         |
| <i>slo-1</i>          | Untreated | 99/97, 86/89, 89/81, 99/116, 94/100, 86/79, 92/94, 94/94, 102/115, 111/106                                                                                                                                                                                                               |
|                       | EtOH      | 69/85, 62/102, 72/93, 48/104, 58/96, 67/107, 47/89, 53/87, 40/97, 43/93, 25/60, 38/78, 29/87, 43/76, 46/74                                                                                                                                                                               |
| <i>cat-2</i>          | Untreated | 101/99, 101/103, 97/94, 116/109, 98/108, 100/106, 98/102, 103/104, 99/97, 99/104,                                                                                                                                                                                                        |
|                       | EtOH      | 35/56, 12/43, 20/11,30/76, 22/43, 31/60,22/22, 14/11, 25/28, 12/28, 12/16, 14/58, 18/66, 15/16, 4/18, 8/34, 5/20, 6/24, 84/112, 94/92, 98/110, 86/102, 76/103, 96/105, 72/88, 73/101, 72/90, 92/105, 76/108, 74/88, 50/83, 70/87, 62/81, 48/88, 56/67, 59/72, 40/85, 12/55, 25/53, 35/63 |
| <i>dop-1</i>          | Untreated | 94/88, 88/84, 86/84,93/98, 92/94, 92/89, 101/94, 94/89, 94/99, 84/81                                                                                                                                                                                                                     |
|                       | EtOH      | 50/67,37/63, 45/67, 33/53, 14/45, 54/59, 40/58, 51/12, 29/35, 20/37, 22/47, 19/60, 33/38, 11/37, 14/25, 14/47, 10/15, 20/25, 7/35                                                                                                                                                        |
| <i>dop-2; dop-3</i>   | Untreated | 91/90, 104/99, 114/115, 104/94, 104/105, 111/112, 115/122, 106/97, 114/116, 94/99                                                                                                                                                                                                        |
|                       | EtOH      | 65/82, 72/85, 48/73, 60/65, 85/103, 63/89, 35/42, 55/68, 56/69, 66/65, 49/60, 69/70, 66/78, 49/73, 42/57, 59/72, 45/59, 57/58, 43/84                                                                                                                                                     |
| <i>dop-4 (ok1321)</i> | Untreated | 117/112, 114/111, 101/111, 94/105, 117/96, 96/102, 107/117, 104/111, 120/108, 107/107                                                                                                                                                                                                    |
|                       | EtOH      | 17/67, 42/68, 54/84, 46/80, 50/76, 44/70, 38/81, 47/86, 35/84 23/79, 52/58, 65/72, 57/77, 60/89, 21/50                                                                                                                                                                                   |
| <i>dop-4 (tm1392)</i> | Untreated | 125/95, 118/103, 117/110, 116/114, 114/135, 128/135, 119/109, 122/112, 114/124, 109/110                                                                                                                                                                                                  |
|                       | EtOH      | 90/84, 100/113, 30/85, 63/76, 70/103, 14/69, 69/70, 18/75, 65/91, 13/27, 6/24, 16/24, 21/41, 12/37, 13/20, 37/47, 12/53, 36/53, 45/59, 12/44                                                                                                                                             |

**Table S1.** Raw data broken into groups of genotype and treatment used to calculate percentage acceleration in response to blue light for Figure 3D. Paired values represent number of head bends observed in two 60 second time windows before and after blue light for different individual worms. Each worm was recorded and exposed to blue light only once.
